# Supplementary material for: Mesoporous anatase TiO2 submicrospheres embedded in self-assembled three-dimensional reduced graphene oxide networks for enhanced lithium storage
Source: Royal Society of Chemistry journal article supplement (doi:10.1039/c3ta12428b), 2013-01-01
Supplement: c3ta12428b.pdf [file c3ta12428b.pdf]

## Electronic Supplementary Information

### Mesoporous anatase TiO<sub>2</sub> submicrospheres embedded in self-assembled three-dimensional reduced graphene oxide networks for enhanced lithium storage

S. X. Yu, L. W. Yang\*, Y. Tian, P. Yang, F. Jiang, S. W. Hu, X. L. Wei, J. X. Zhong

*Hunan Key Laboratory of Micro-Nano Energy Materials and Devices, Faculty of Materials and Optoelectronic Physics, Xiangtan University, Hunan 411105,*

*China*

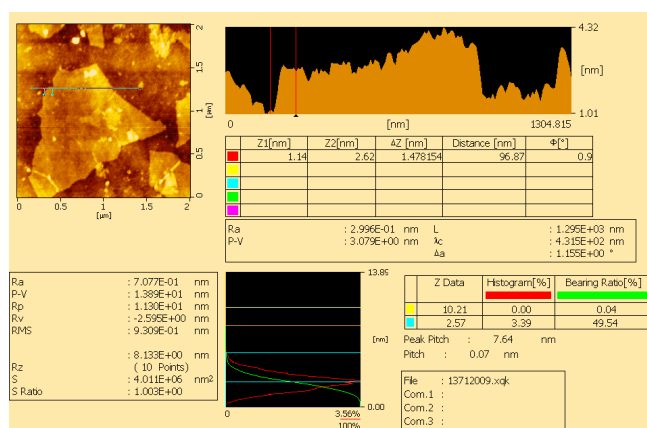

Figure S1 Typical AFM image of GO coated on silicon wafer. The AFM result shows that the thickness of GO is about 1.5nm.

\* Corresponding authors: ylwxtu@xtu.edu.cn

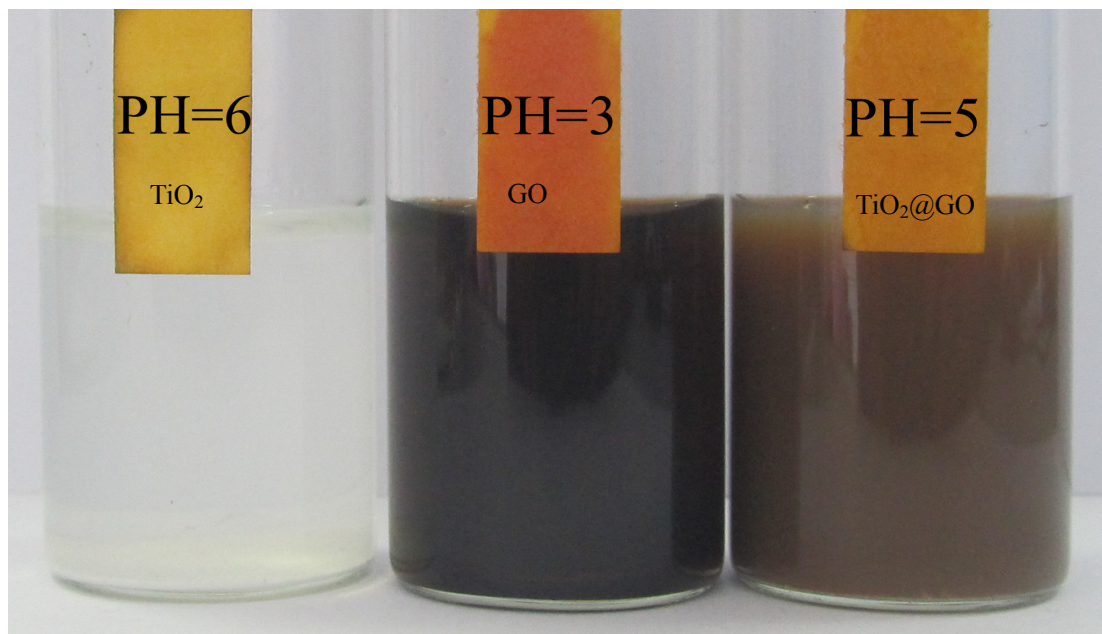

Figure S2 Photographs and PH illustrations of pure TiO<sub>2</sub>, GO and TiO<sub>2</sub>@GO in water solution.

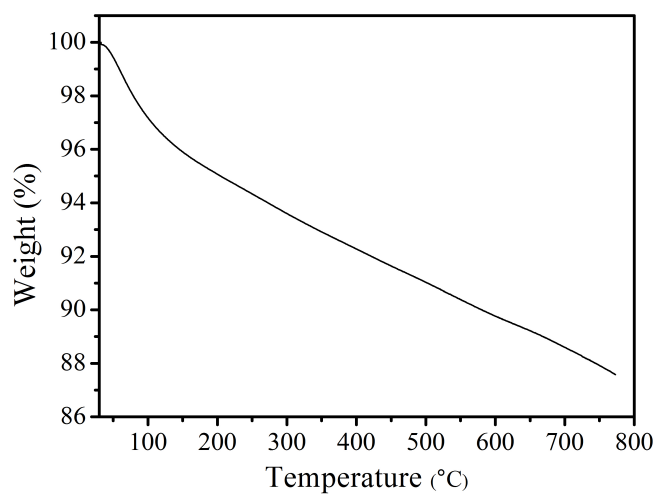

Figure S3 The TGA curve of MTO/3D-GN composite prepared using GO and amorphous  $\text{TiO}_2$  submicrospherer with weight ratio of 1: 1. One can see that the mass loss is only 11% over the range of 100~700°C, indicating that the reduction of GO is efficient and the obtained MTO/3D-GN hybrid aerogel is thermally stable.
